# Supplementary material for: Genetic Counseling Patient Attitudes, Cultural, Psychosocial Factors in Middle East
Source: Research Square preprint supplement (doi:10.21203/rs.3.rs-5578325/v1), 2024-12-27
Supplement: Supplementary file 1 [file 9a30bf5c39394b3eab5027d3.docx]

**Table 2:** SET 2: Survey questions focusing on genetic counselling practice

| **Topic** | **Questions** |
| --- | --- |
| Cultural challenges in counseling | 1. Are there unique challenges between each patient ethnic group? 2. What are some of the challenges that you have faced while discussing genetics with the middle eastern population? 3. What has been your experience with discussing consanguinity with the middle eastern population? |
| Patient’s attitudes towards genetics | 1. How would you describe the middle eastern population’s attitude towards genetics and genetic testing? 2. What is your perspective/experience of how families in the middle east perceive a genetic diagnosis? |
| Counseling techniques and considerations | 1. What are differences that you have encountered between practicing in the middle east and practicing in other countries? 2. Do you utilize different counseling techniques between different ethnicities? If yes, please explain. 3. What are some cultural considerations while working with the middle eastern population? 4. Are there any specific psychosocial considerations while working with the middle eastern population? |
