# Supplementary material for: Genetic Counseling Patient Attitudes, Cultural, Psychosocial Factors in Middle East
Source: Research Square preprint supplement (doi:10.21203/rs.3.rs-5578325/v1), 2024-12-27
Supplement: Supplementary file 2 [file 9af5c37967d7a659767c33bc.docx]

**Table 1:** SET 1: Survey questions focusing on providers’ and patients’ demographics

| **Topic** | **Questions** |
| --- | --- |
| Healthcare provider backgrounds | 1. What is your profession? 2. What setting do you practice in? 3. What speciality do you work in? 4. How long have you been practicing for? 5. How long have you been practicing for in the middle east? |
| Geographic information | 1. What is your nationality? 2. Which middle eastern country are you practising in? 3. Which country did you receive your training in? 4. Which countries did you previously practice in? |
| Ethnicity and consanguinity of patient population | 1. What ethnicities (e.g. Middle East, Africa, South Asia, South-East Asia, EasternEuropean, European, North American, South American) do your patients belong to? 2. What is the estimated proportion of each ethnicity in your patient population? 3. What percentage of your patient population is consanguineous (e.g. parents are related by blood)? |
