# Supplementary material for: Genetic Counseling Patient Attitudes, Cultural, Psychosocial Factors in Middle East
Source: Research Square preprint supplement (doi:10.21203/rs.3.rs-5578325/v1), 2024-12-27
Supplement: Supplementary file 3 [file e6de61ee776e2bd43df6b657.docx]

**Table 3**. Respondents’ years of experience

| **Time frame** | **How long have you been practising for?**  **(% of respondents)** | **How long have you been practising in the Middle East?**  **(% of respondents)** |
| --- | --- | --- |
| 0-5 years | 37.5% | 59.38% |
| 6-10 years | 25% | 18.75% |
| 11-15 years | 6.25% | 3.13% |
| More than 15 years | 31.25% | 18.75% |
